# Supplementary material for: Analysis of microRNA profile of Anopheles sinensis by deep sequencing and bioinformatic approaches
Source: PubMed Central journal article supplement (PMC5848538; doi:10.1186/s13071-018-2734-7), 2018-03-12

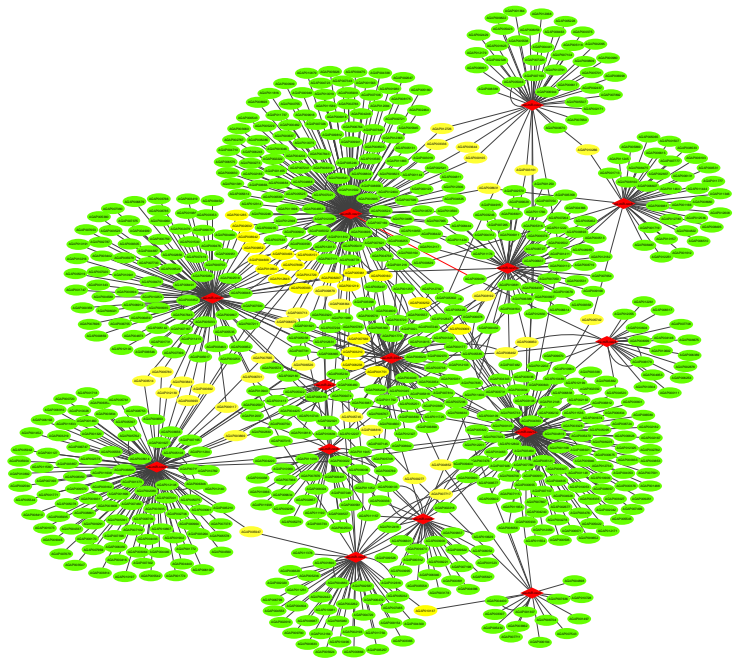

Supplement: 13071_2018_2734_MOESM6_ESM.pdf [file 13071_2018_2734_MOESM6_ESM.pdf]
